# Supplementary material
Source: publisher figshare collection journal article supplement (https://acs.figshare.com/ndownloader/files/11323691)
Supplement: Supplementary file 1 [file 11323691]

Compound_ID	SMILE	NMDAR Emax (%)	NMDAR EC50 (µM)	Steroid concentration (µM)	n
1	C[C@]12C(C[C@@H](OS(=O)([O-])=O)CC2)=CCC3C1CC[C@@]4(C)C3CC[C@]4([H])C(C)=O.[H+][N]5=CC=CC=C5	116 ± 10	21.7 ± 1.6	3-100	8
2	CC(C1CCC2C(C3CC[C@@]21C)CC=C([C@]3(C)CC4)C[C@H]4OC(C(O)=O)=O)=O	93 ± 25	48.6 ± 12.4	1-30	5
3	CC(C1CCC2C(C3CC[C@@]21C)CC=C([C@]3(C)CC4)C[C@H]4OC(CC(O)=O)=O)=O	108 ± 15	39.8 ± 10.3	1-30	5
4	CC(C1CCC2C(C3CC[C@@]21C)CC=C([C@]3(C)CC4)C[C@H]4OC(CCC(O)=O)=O)=O	177 ± 46	27.6 ± 12.1	1-30	4
5	C[C@]1(CC2)C(C[C@H]2OC(CCCC(O)=O)=O)=CCC3C1CC[C@@]4(C)C3CCC4C(C)=O	183 ± 25	19.0 ± 3.4	1-30	4
6	CC(C1CCC2C3CC=C4C[C@@H](OC(CCCCC(O)=O)=O)CC[C@]4(C)C3CC[C@@]21C)=O	151 ± 16	8.5 ± 1.0	1-30	10
7	CC(C1CCC2C3CC=C4C[C@@H](OC(CCCCCC(O)=O)=O)CC[C@]4(C)C3CC[C@@]21C)=O	191 ± 63	18.0 ± 7.9	1-30	5
8	CC(C1CCC2C3CC=C4C[C@@H](OC(CCCCCCC(O)=O)=O)CC[C@]4(C)C3CC[C@@]21C)=O	156 ± 30	19.3 ± 1.7	1-30	5
9	CCC1CCC2C(C3CC[C@@]21C)CC=C([C@]3(C)CC4)C[C@H]4OC(CC(O)=O)=O	71 ± 7	10.7 ± 0.8	0.3-30	7
10	CCC1CCC2C(C3CC[C@@]21C)CC=C([C@]3(C)CC4)C[C@H]4OC(CCC(O)=O)=O	133 ± 19	9.9 ± 5.2	0.3-30	6
11	C[C@]1(CC2)C(C[C@H]2OC(CCCC(O)=O)=O)=CCC3C1CC[C@@]4(C)C3CCC4CC	209 ± 22	9.9 ± 3.7	0.3-30	5
12	C[C@]1(CC2)C(C[C@H]2OC(CCCCC(O)=O)=O)=CCC3C1CC[C@@]4(C)C3CCC4CC	60 ± 12	17.2 ± 4.5	0.3-30	4
13	C[C@]1(CC2)C(C[C@H]2OC(CCCCCC(O)=O)=O)=CCC3C1CC[C@@]4(C)C3CCC4CC	48 ± 11	26.2 ± 8.1	0.3-30	4
14	C[C@]1(CC2)C(C[C@H]2OC(CC(O)=O)=O)=CCC3C1CC[C@@]4(C)C3CCC4	236 ± 27	4.7 ± 1.0	0.3-30	4
15	C[C@]1(CC2)C(C[C@H]2OC(CCC(O)=O)=O)=CCC3C1CC[C@@]4(C)C3CCC4	452 ± 46	7.4 ± 0.4	0.3-30	5
16	C[C@]1(CC2)C(C[C@H]2OC(CCCC(O)=O)=O)=CCC3C1CC[C@@]4(C)C3CCC4	348 ± 32	5.2 ± 1.2	0.3-30	7
17	C[C@]1(CC2)C(C[C@H]2OC(CCCCC(O)=O)=O)=CCC3C1CC[C@@]4(C)C3CCC4	191 ± 10	2.8 ± 0.5	0.3-30	5
18	C[C@]1(CC2)C(C[C@H]2OC(CCCCCC(O)=O)=O)=CCC3C1CC[C@@]4(C)C3CCC4	109 ± 13	1.8 ± 0.3	0.3-30	4
19	C[C@]1(CC2)C(C[C@H]2OC(CCCC(O)=O)=O)=CCC3C1CC[C@@]4(C)C3CCC4=O	142 ± 24	142.1 ± 33.9	1-100	4
20	C[C@]1(CC2)C(C[C@H]2OC(CCCCC(O)=O)=O)=CCC3C1CC[C@@]4(C)C3CCC4=O	184 ± 24	111.9 ± 25.3	1-100	4
21	C[C@]1(CC2)C(C[C@H]2OC(CCCCCC(O)=O)=O)=CCC3C1CC[C@@]4(C)C3CCC4=O	187 ± 27	82.4 ± 16.9	1-100	7
22	C[C@]1(CC2)C(C[C@H]2OC(CCCCCCC(O)=O)=O)=CCC3C1CC[C@@]4(C)C3CCC4=O	189 ± 35	49.1 ± 13.7	1-100	5
23	C[C@]1(CC2)C(C[C@H]2OC(CCCCCCCC(O)=O)=O)=CCC3C1CC[C@@]4(C)C3CCC4=O	226 ± 45	38.2 ± 14.5	1-100	5
24	C[C@]1(CC2)C(C[C@H]2OC(CCCCCCCCC(O)=O)=O)=CCC3C1CC[C@@]4(C)C3CCC4=O	165 ± 11	16.1 ± 0.9	1-100	5
